# Supplementary material for: Molecular Evidence of Orthomyxovirus Presence in Colombian Neotropical Bats
Source: Front Microbiol. 2022 Apr 26;13:845546. doi: 10.3389/fmicb.2022.845546 (PMC9087557; doi:10.3389/fmicb.2022.845546)
Supplement: Supplementary file 1 [file Table_1.DOCX]

Supplementary Material

# Table S1: Scientific and common names of Fruit-eating bat species.

| **Species** | **Common name** |
| --- | --- |
| *Artibeus obscurus* | Dark Fruit-eating Bat |
| *Artibeus planirostris* | Flat-faced Fruit-eating Bat |
| *Artibeus amplus* | Large Fruit-eating Bat |
| *Artibeus hirsutus* | Hairy Fruit-eating Bat |
| *Artibeus schwartzi* | - |
| *Artibeus aequatorialis* | - |
| *Artibeus lituratus* | Great Fruit-eating Bat |
| *Artibeus inopinatus* | Honduran Fruit-eating Bat |
| *Artibeus jamaicensis* | Jamaican Fruit-eating Bat |
| *Artibeus fraterculus* | Fraternal Fruit-eating Bat |
| *Artibeus concolor* | Brown Fruit-eating Bat |
| *Artibeus fimbriatus* | Fringed Fruit-eating Bat |
| *Artibeus phaeotis*a | Pygmy Fruit-eating Bat |
| *Artibeus watsoni*b | Thomas's Fruit-eating Bat |
| *Artibeus tolteca*c | Toltec Fruit-eating Bat |
| *Artibeus cinerea*d | Gervais's Fruit-eating Bat |
| *Artibeus anderseni*e | Andersen's Fruit-eating Bat |
| *Artibeus hartii*f | Velvety Fruit-eating Bat |
| *Artibeus gnoma*g | Dwarf Fruit-eating Bat |
| *Artibeus rosenbergi*h | Rosenberg’s Fruit-eating Bat |
| *Artibeus glauca*i | Silver Fruit-eating Bat |
| *Artibeus azteca*j | Aztec Fruit-eating Bat |

a: Synonym *Dermanura phaeotis.* b: Synonym *Dermanura watsoni*. c: Synonym *Dermanura tolteca*. d: Synonym Synonym e: *Dermanura anderseni*. f:Synonym *Enchisthenes hartii*. g: Synonym *Dermanura gnoma*. h: Synonym *Dermanura rosenbergi*. i:Synonym *Dermanura glauca*. j:Synonym *Dermanura azteca*.

**
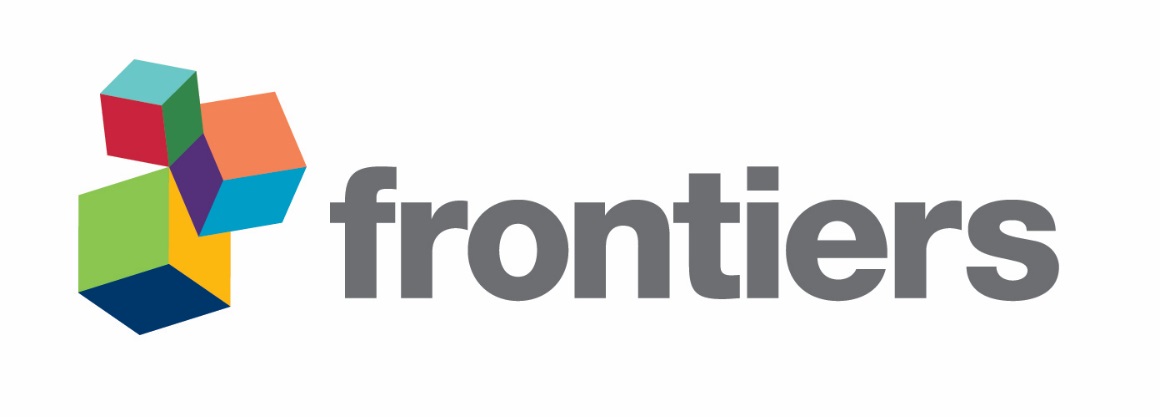
**
